# Supplementary material for: Ambient pressure synthesis and structure and magnetic properties of a new A- and B-site ordered multinary quadruple perovskite
Source: Royal Society of Chemistry journal article supplement (doi:10.1039/d4dt00973h), 2024-01-01
Supplement: d4dt00973h1.pdf [file d4dt00973h1.pdf]

Supplementary information

## Ambient Pressure Synthesis, Structure and Magnetic Properties of a New *A*- and *B*-Site Ordered Multinary Quadruple Perovskite

Lalit Kumar,<sup>a, b</sup> Sujan Sen<sup>a</sup> and Tapas Kumar Mandal\*,<sup>a, c</sup>

<sup>a</sup>Department of Chemistry, Indian Institute of Technology Roorkee, Roorkee – 247667, India

<sup>b</sup>Department of Applied Science and Humanities, Invertis University, Bareilly – 243123, India

<sup>c</sup>Center for Nanotechnology, Indian Institute of Technology Roorkee, Roorkee – 247667, India.

Corresponding author:

\*E-mail: [tapas.mandal@cy.iitr.ac.in](mailto:tapas.mandal@cy.iitr.ac.in)

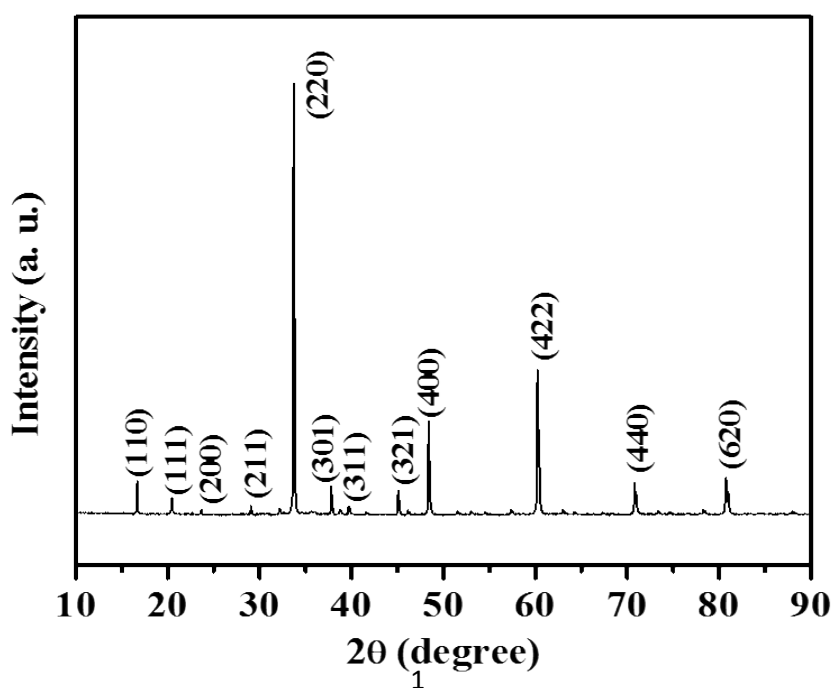

Fig. S1 P-XRD data of  $\text{LaCu}_3\text{Fe}_2\text{RuSbO}_{12}$ .

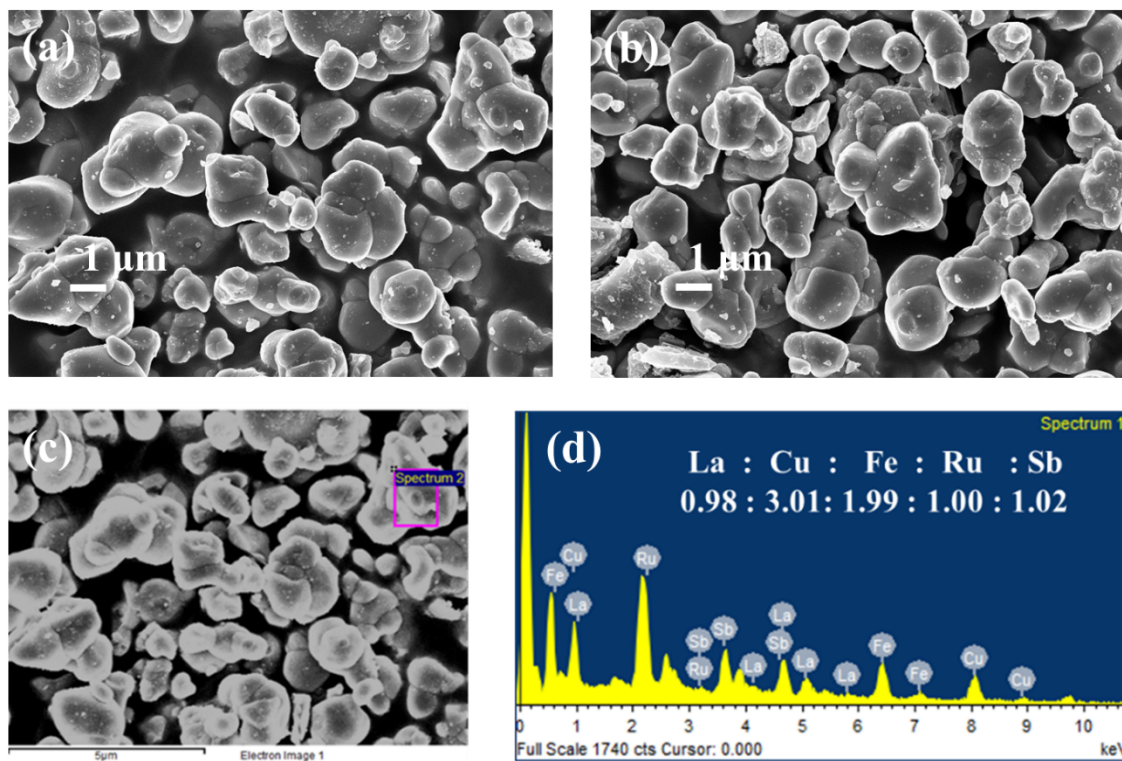

Fig. S2 (a, b) FE-SEM images, (c) image showing EDS analysis region and (d) EDS data of  $\text{LaCu}_3\text{Fe}_2\text{RuSbO}_{12}$ .

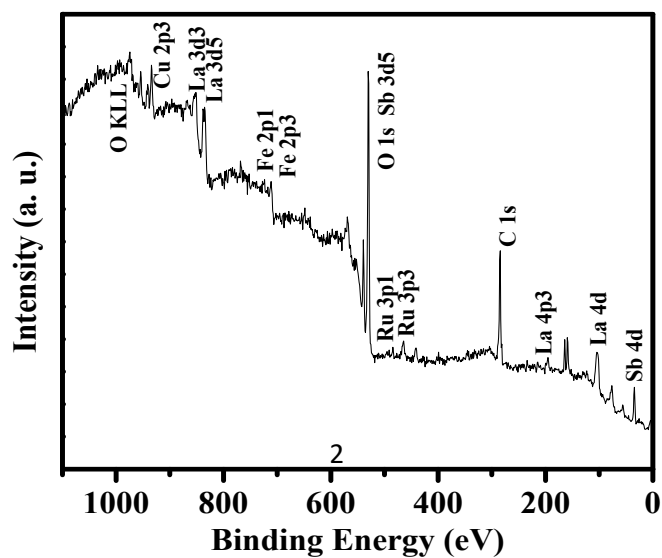

**Fig. S3** Survey XPS of  $\text{LaCu}_3\text{Fe}_2\text{RuSbO}_{12}$ .

**Table S1.** Characteristic temperatures and adjusted pre-factors.

| Characteristic temperatures | Value (K)      | Adjusted pre-factors | Value              |
|-----------------------------|----------------|----------------------|--------------------|
| $\theta_D$                  | $140 \pm 1.3$  | m                    | $5.068 \pm 0.008$  |
| $\theta_{E1}$               | $276 \pm 3.9$  | $n_1$                | $11.463 \pm 0.048$ |
| $\theta_{E2}$               | $825 \pm 12.3$ | $n_2$                | $4.029 \pm 0.018$  |

**Table S2.** GII of  $\text{LaCu}_3\text{Fe}_2\text{RuSbO}_{12}$  for different tilt systems.

| Tilt System | GI (v.u.) |
|-------------|-----------|
| $a^+a^+a^+$ | 0.273     |
| $a^+a^+c^-$ | 0.349     |
| $a^-b^+a^-$ | 0.449     |
| $a^-a^-a^-$ | 0.436     |
| $a^0b^+b^+$ | 0.349     |
| $a^+b^0c^-$ | 0.397     |
| $a^0b^-b^-$ | 0.438     |
| $a^0a^0c^+$ | 0.441     |
| $a^0a^0c^-$ | 0.445     |
| $a^0a^0a^0$ | 0.675     |

**Table S3.** GI, lattice parameter and space group of quadruple perovskites.

| Compositions                                       | GI (v.u.) | a (Å) | Space Group |
|----------------------------------------------------|-----------|-------|-------------|
| $\text{CaCu}_3\text{Fe}_2\text{Sb}_2\text{O}_{12}$ | 0.029     | 7.497 | $Pn-3$      |
| $\text{LaCu}_3\text{Fe}_2\text{Sb}_2\text{O}_{12}$ | 0.106     | 7.531 | $Pn-3$      |
| $\text{CaCu}_3\text{Fe}_2\text{Ru}_2\text{O}_{12}$ | 0.021     | 7.469 | $Pn-3$      |
| $\text{LaCu}_3\text{Fe}_2\text{Ru}_2\text{O}_{12}$ | 0.096     | 7.501 | $Pn-3$      |
